# Supplementary material for: Designing novel inhibitor derivatives targeting SARS-CoV-2 Mpro enzyme: a deep learning and structure biology approach
Source: Royal Society of Chemistry journal article supplement (doi:10.1039/d4me00062e), 2024-01-01
Supplement: d4me00062e1.pdf [file d4me00062e1.pdf]

## Designing Novel Inhibitors Derivatives Targeting SARS-CoV-2 M<sup>pro</sup> Enzyme: A Deep Learning and Structure Biology Approach

Tushar Joshi<sup>#a</sup>, Shalini Mathpal<sup>#a</sup>, Priyanka Sharma<sup>b</sup>, Akshay Abraham<sup>c</sup>, Rajadurai Vijay Solomon<sup>\*c</sup>, Subhash Chandra<sup>\*d</sup>

<sup>a</sup>Department of Biotechnology, Bhimtal Campus, Bhimtal 263136, Kumaun University, Uttarakhand, India

<sup>b</sup>Department of Botany, Kumaun University, DSB Campus, Nainital 263001, Uttarakhand, India

<sup>c</sup>Department of Chemistry, Madras Christian College (Autonomous), [Affiliated to University of Madras], Tambaram East, Chennai 600 059, Tamil Nadu, India

<sup>d</sup>Computational Biology & Biotechnology Laboratory, Department of Botany, SSJ University, Almora 263601, Uttarakhand, India

# Tushar Joshi and Shalini Mathpal contributed equally to this work.

### Corresponding authors\*:

1- Subhash Chandra\*

Mailing address: Computational Biology & Biotechnology Laboratory, Department of Botany, Soban Singh University, Almora 263601, Uttarakhand, India

E-mail: [scjnu@yahoo.co.in](mailto:scjnu@yahoo.co.in)

2- Rajadurai Vijay Solomon\*

Department of Chemistry, Madras Christian College (Autonomous), [Affiliated to University of Madras], Tambaram East, Chennai 600 059, Tamil Nadu, India

Email: [vjsolo@gmail.com](mailto:vjsolo@gmail.com)

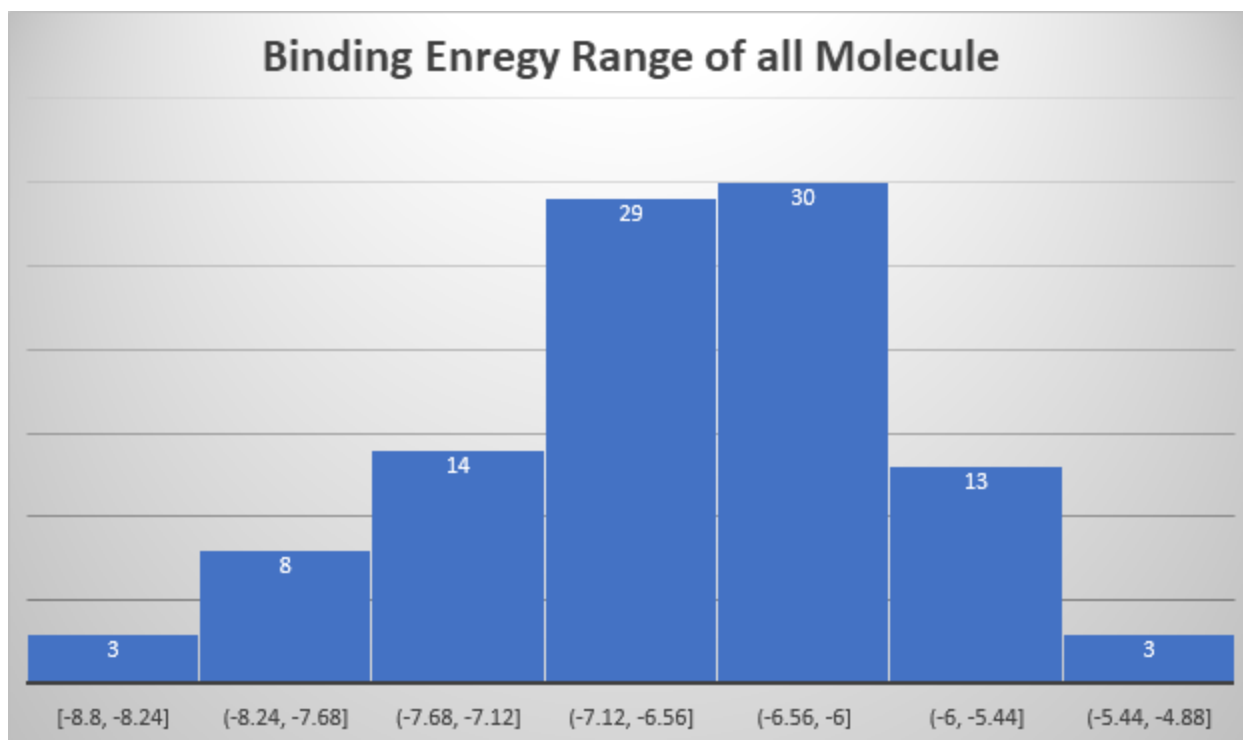

**Figure S1:** Binding energy range of all designed molecules after Molecular Docking study

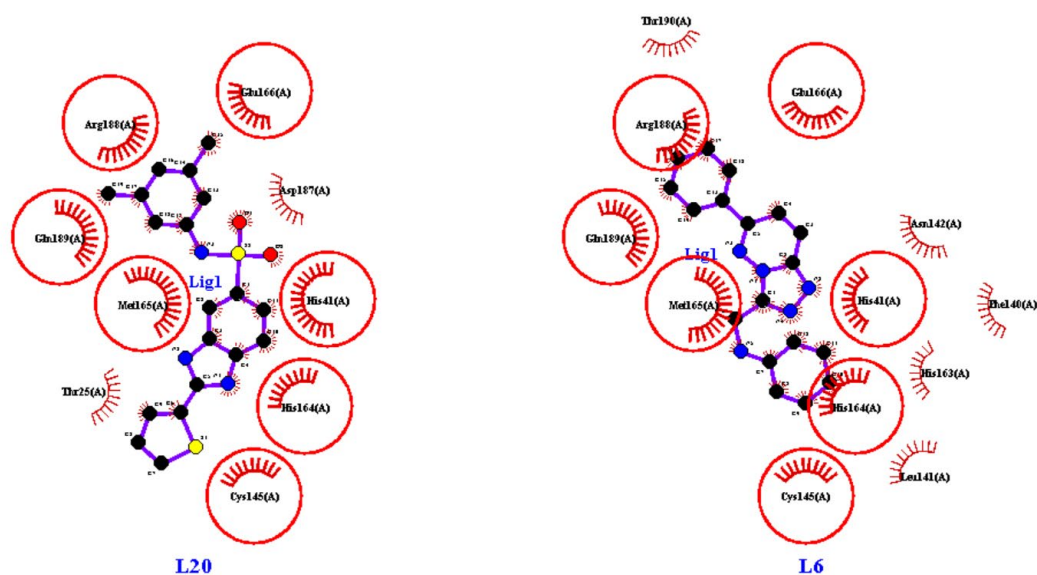

**Figure S2:** 2D interaction of L20 and L6 compounds showing Hydrophobic Bonds with Mpro.
